# Supplementary material
Source: PubMed Central journal article supplement (PMC137845)

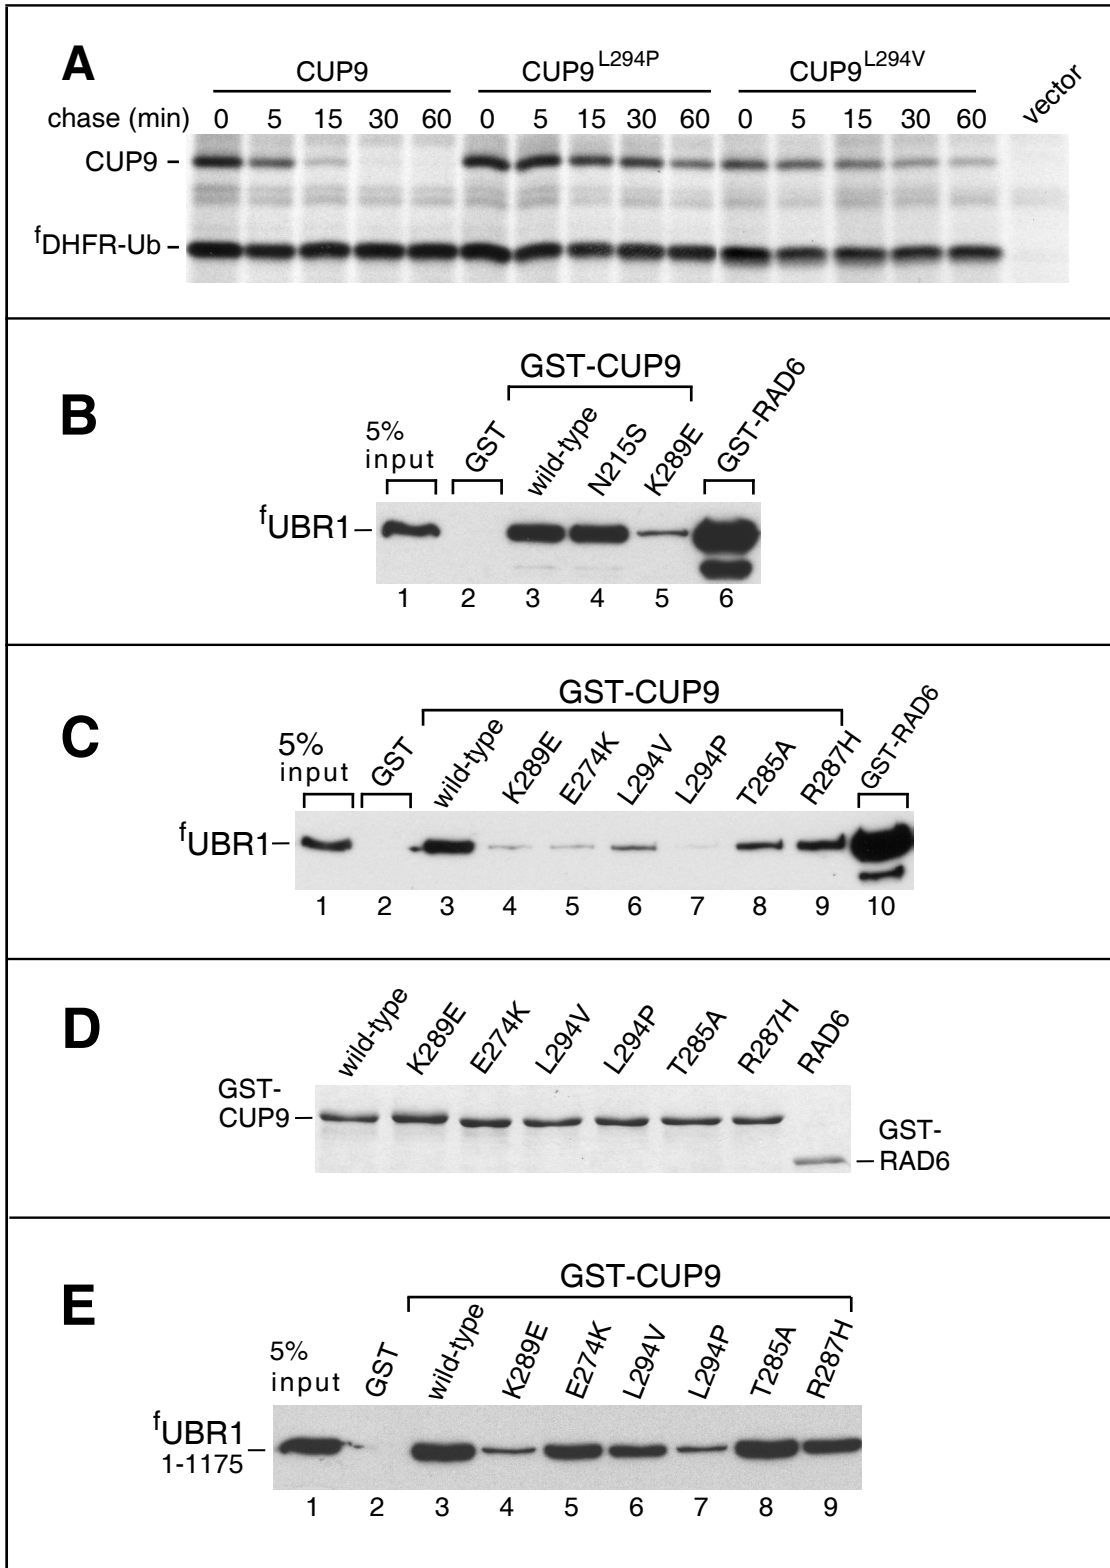

Figure S1, Supporting Information (Du et al.)

Supplement: pnas_172527399_3.pdf [file pnas_172527399_3.pdf]
